# Supplementary material for: Selective guest retention in thermal guest-release process in sandwich-type inclusion crystal of cholic acid
Source: Royal Society of Chemistry journal article supplement (doi:10.1039/b918639e), 2009-12-24
Supplement: b918639e.pdf [file b918639e.pdf]

## **Electronic Supplementary Information**

### **Selective Guest Retention in Thermal Guest-release Process in Sandwich-type Inclusion Crystal of Cholic Acid**

**Kazunori Nakano, Shigendo Akita, Taketoshi Murai, Wen-Tzu Liu, Ichiro Hisaki,  
Norimitsu Tohnai, Mikiji Miyata**

### Crystallographic data

|                                                    | CA·(G1·G2)                                                                                                           |
|----------------------------------------------------|----------------------------------------------------------------------------------------------------------------------|
| Formula moiety                                     | C <sub>24</sub> H <sub>40</sub> O <sub>5</sub> , C <sub>9</sub> H <sub>8</sub> ,<br>C <sub>6</sub> H <sub>6</sub> FN |
| Empirical formula                                  | C <sub>39</sub> H <sub>54</sub> FNO <sub>5</sub>                                                                     |
| Molecular weight                                   | 635.83                                                                                                               |
| Color, Habit                                       | Colorless platelet                                                                                                   |
| Crystal system                                     | Monoclinic                                                                                                           |
| Space group                                        | <i>P</i> 2 <sub>1</sub> (No. 4)                                                                                      |
| <i>Z</i>                                           | 2                                                                                                                    |
| <i>a</i> /Å                                        | 14.8259(5)                                                                                                           |
| <i>b</i> /Å                                        | 7.8389(2)                                                                                                            |
| <i>c</i> /Å                                        | 16.1032(5)                                                                                                           |
| $\alpha$ /°                                        | 90                                                                                                                   |
| $\beta$ /°                                         | 108.6510(16)                                                                                                         |
| $\gamma$ /°                                        | 90                                                                                                                   |
| Volume/Å <sup>3</sup>                              | 1773.21(9)                                                                                                           |
| Density/g cm <sup>-3</sup>                         | 1.191                                                                                                                |
| Temperature/K                                      | 273                                                                                                                  |
| X-Ray<br>wavelength/Å                              | 1.54187                                                                                                              |
| $\mu$ /mm <sup>-1</sup>                            | 0.6477                                                                                                               |
| $2\theta_{\max}$ /°                                | 136.5                                                                                                                |
| No. of reflections/<br>Total                       | 20060                                                                                                                |
| No. of reflections/<br>unique                      | 5641                                                                                                                 |
| <i>R</i> <sub>int</sub>                            | 0.060                                                                                                                |
| <i>R</i> <sub>1</sub> ( <i>I</i> < 2σ( <i>I</i> )) | 0.0623                                                                                                               |
| <i>wR</i> <sub>2</sub> (all)                       | 0.1922                                                                                                               |
